# Supplementary material for: Thymocytes trigger self-antigen-controlling pathways in immature medullary thymic epithelial stages
Source: eLife journal article supplement (doi:10.7554/elife.69982), 2022-01-14
Supplement: supp1 [file elife-69982-supp1-v2.pdf]

Supplementary file 1

| AIRE_dependent_FEZF2_independent TRAs |               |                       |
|---------------------------------------|---------------|-----------------------|
| Gene ID                               | Gene symbol   | mRNA Accession number |
| 69364                                 | 1700012P22Rik | NM_027056.1           |
| 70882                                 | Armc3         | NM_001081083.2        |
| 11435                                 | Chrna1        | NM_007389.5           |
| 26887                                 | Chst4         | NM_011998.4           |
| 76703                                 | Cpb1          | NM_029706.2           |
| 240058                                | Cpne5         | NM_001360239.1        |
| 12918                                 | Crh           | NM_205769.3           |
| 26898                                 | Ctsj          | NM_001356291.1        |
| 13076                                 | Cyp1a1        | NM_001136059.2        |
| 75465                                 | Dynlrb2       | NM_029297.1           |
| 52614                                 | Emr4          | NM_139138.3           |
| 77767                                 | Ermn          | NM_029972.3           |
| 240121                                | Fsd1          | NM_183178.2           |
| 14371                                 | Fzd9          | NM_010246.1           |
| 14531                                 | Gcm1          | NM_008103.3           |
| 14621                                 | Gjb4          | NM_008127.4           |
| 15162                                 | Hck           | NM_001172117.1        |
| 16069                                 | Igj           | NM_152839.3           |
| 69540                                 | Klk10         | NM_133712.2           |
| 74354                                 | Lrguk         | NM_028886.1           |
| 76668                                 | Mdh1b         | NM_029696.4           |
| 104362                                | Meig1         | NM_001355205.1        |
| 18039                                 | Nefl          | NM_010910.2           |
| 18133                                 | Nov           | NM_010930.4           |
| 64011                                 | Nrgn          | NM_022029.2           |
| 18976                                 | Pomc          | NM_001278581.1        |
| 18776                                 | Prl3b1        | NM_008865.3           |
| 72373                                 | Psca          | NM_028216.2           |
| 72242                                 | Psg21         | NM_027403.4           |
| 380683                                | Sec14l3       | NM_001029937.2        |
| 20604                                 | Sst           | NM_009215.1           |
| 70956                                 | Tex19.2       | NM_027622.3           |
| 381107                                | Tmem232       | NM_001008973.2        |
| 76670                                 | Ttc18         | NM_001163638.1        |
| 73301                                 | Ttc29         | NM_183096.3           |
| 69480                                 | Ttc9          | NM_001033149.3        |
| 72094                                 | Ugt2a3        | NM_028094.3           |
| 71860                                 | Wdr16         | NM_027963.2           |
| 22403                                 | Wisp2         | NM_016873.2           |
| 22773                                 | Zic3          | NM_009575.2           |

| FEZF2_dependent_AIRE_independent TRAs |             |                       |
|---------------------------------------|-------------|-----------------------|
| Gene ID                               | Gene symbol | mRNA Accession number |
| 14128                                 | Fcer2a      | NM_001253737.1        |
| 15002                                 | H2-Ob       | NM_010389.3           |
| 16521                                 | Kcnj5       | NM_010605.5           |
| 246313                                | Prokr2      | NM_144944.3           |
| 246709                                | Rgs13       | NM_153171.4           |

| AIRE_dependent_FEZF2_dependent TRAs |             |                       |
|-------------------------------------|-------------|-----------------------|
| Gene ID                             | Gene symbol | mRNA Accession number |
| 16678                               | Krt1        | NM_008473.2           |
| 19692                               | Reg1        | NM_009042.2           |

| AIRE_independent_FEZF2_independent TRAs |               |                       |
|-----------------------------------------|---------------|-----------------------|
| Gene ID                                 | Gene symbol   | mRNA Accession number |
| 75556                                   | 1700026D08Rik | NM_029335.3           |
| 239559                                  | A4galt        | NM_001004150.3        |
| 110751                                  | Adam33        | NM_001163529.2        |
| 108153                                  | Adamts7       | NM_001003911.2        |
| 224129                                  | Adcy5         | NM_001012765.5        |
| 11689                                   | Alox5         | NM_009662.2           |
| 64933                                   | Ap3m2         | NM_001122820.1        |
| 545260                                  | Arsi          | NM_001038499.1        |
| 319767                                  | Atp10b        | NM_176999.3           |
| 68127                                   | B230217C12Rik | NM_001080935.         |
| 12012                                   | Baat          | NM_007519.3           |
| 212998                                  | BC016579      | NM_145389.2           |
| 332713                                  | BC051628      | NM_199312.3           |
| 12169                                   | Bmx           | NM_009759.4           |
| 547431                                  | Btnl2         | NM_079835.2           |
| 71764                                   | C2cd2l        | NM_001359259.1        |
| 245555                                  | C77370        | NM_001077354.2        |
| 260299                                  | Cadm4         | NM_153112.3           |
| 71213                                   | Cage1         | NM_027724.2           |
| 12354                                   | Car7          | NM_001301164.1        |
| 228942                                  | Cbln4         | NM_175631.3           |
| 207607                                  | Ccdc40        | NM_175430.4           |
| 70445                                   | Cd248         | NM_054042.2           |
| 102657                                  | Cd276         | NM_133983.4           |
| 12647                                   | Chat          | NM_009891.2           |
| 108699                                  | Chn1          | NM_001113246.2        |
| 83453                                   | Chrdl1        | NM_001114385.1        |
| 12265                                   | Ciita         | NM_001243760.2        |
| 56863                                   | Cldn9         | NM_020293.3           |
| 12944                                   | Crp           | NM_007768.4           |
| 320127                                  | Dgki          | NM_001081206.2        |
| 13449                                   | Dok2          | NM_010071.2           |

|        |         |                |
|--------|---------|----------------|
| 14073  | Faah    | NM_010173.5    |
| 14238  | Foxf2   | NM_010225.2    |
| 15223  | Foxj1   | NM_008240.3    |
| 64337  | Gng13   | NM_001357782.1 |
| 14998  | H2-DMa  | NM_001360530.1 |
| 14999  | H2-DMb1 | NM_010387.3    |
| 15000  | H2-DMb2 | NM_010388.4    |
| 381091 | H2-Eb2  | NM_001033978.3 |
| 15001  | H2-Oa   | NM_008206.2    |
| 66438  | Hamp2   | NM_183257.4    |
| 15114  | Hap1    | NM_001359052.1 |
| 171283 | Havcr1  | NM_001166631.1 |
| 16153  | Il10    | NM_010548.2    |
| 50905  | Il17rb  | NM_019583.3    |
| 16408  | Itgal   | NM_001253872.1 |
| 16420  | Itgb6   | NM_001159564.1 |
| 16891  | Lipg    | NM_010720.3    |
| 16970  | Lrmp    | NM_001281980.1 |
| 16977  | Lrrc23  | NM_001302555.1 |
| 17179  | Matk    | NM_001285853.1 |
| 50913  | Olig2   | NM_016967.2    |
| 214424 | Parp16  | NM_177460.4    |
| 279653 | Pcdh19  | NM_001105245.1 |
| 320207 | Pik3r5  | NM_177320.2    |
| 104709 | Pik3r6  | NM_001004435.3 |
| 241113 | Prkag3  | NM_153744.3    |
| 246710 | Rhobtb2 | NM_153514.5    |
| 67071  | Rps6ka6 | NM_025949.3    |
| 22092  | Rsph1   | NM_025290.3    |
| 56788  | Scube2  | NM_020052.2    |
| 74478  | Snx29   | NM_001290148.1 |
| 223227 | Sox21   | NM_177753.3    |
| 20680  | Sox7    | NM_011446.1    |
| 68792  | Srpx2   | NM_001083895.3 |
| 20849  | Stat4   | NM_001308266.1 |
| 21687  | Tek     | NM_001290549.1 |
| 381339 | Tmem182 | NM_001081198.1 |
| 140765 | Tmprss3 | NM_001163776.1 |
| 210801 | Unc5d   | NM_001347498.1 |
| 100647 | Upk3b   | NM_175309.4    |
| 245595 | Zfp711  | NM_177747.3    |
