# Supplementary material for: Thymocytes trigger self-antigen-controlling pathways in immature medullary thymic epithelial stages
Source: eLife journal article supplement (doi:10.7554/elife.69982), 2022-01-14
Supplement: supp2 [file elife-69982-supp2-v1.pdf]

Supplementary file 2

| AIRE_dependent_FEZF2_independent TRAs |               |                       |
|---------------------------------------|---------------|-----------------------|
| Gene ID                               | Gene symbol   | mRNA Accession number |
| 69318                                 | 1700007K09Rik | NM_027037.2           |
| 69325                                 | 1700012B09Rik | NM_029306.3           |
| 73634                                 | 1700125H20Rik | NM_028589.1           |
| 69457                                 | 2310005G13Rik | NM_001358101.1        |
| 381816                                | 4922502D21Rik | NM_199034.3           |
| 11451                                 | Acrv1         | NM_007391.2           |
| 105349                                | Akr1c18       | NM_001346535.1        |
| 76768                                 | Alpi          | NM_001081082.2        |
| 11647                                 | Alpl          | NM_001287172.1        |
| 11694                                 | Alx3          | NM_007441.3           |
| 71724                                 | Aox3          | NM_023617.2           |
| 11807                                 | Apoa2         | NM_001305549.1        |
| 244867                                | Arhgap20      | NM_175535.3           |
| 382000                                | AY761184      | NM_001007582.3        |
| 81799                                 | C1qtnf3       | NM_001204134.1        |
| 234964                                | Ccdc67        | NM_181816.2           |
| 20299                                 | Ccl22         | NM_009137.2           |
| 218630                                | Ccno          | NM_001081062.1        |
| 170786                                | Cd209a        | NM_133238.5           |
| 170779                                | Cd209d        | NM_130904.2           |
| 69142                                 | Cd209f        | NM_026956.2           |
| 12502                                 | Cd3g          | NM_009850.2           |
| 66996                                 | Ceacam11      | NM_023289.2           |
| 17474                                 | Clec4d        | NM_001163161.1        |
| 51811                                 | Clec4f        | NM_016751.3           |
| 76703                                 | Cpb1          | NM_029706.2           |
| 12891                                 | Cpne6         | NM_001136057.3        |
| 12903                                 | Crabp1        | NM_001284507.1        |
| 12918                                 | Crh           | NM_205769.3           |
| 12954                                 | Cryaa         | NM_001278569.1        |
| 105859                                | Csdc2         | NM_145473.3           |
| 26898                                 | Ctsj          | NM_001356291.1        |
| 55985                                 | Cxcl13        | NM_018866.2           |
| 110115                                | Cyp11b1       | NM_001033229.3        |
| 13077                                 | Cyp1a2        | NM_009993.3           |
| 382059                                | Defa22        | NM_207658.4           |
| 13386                                 | Dlk1          | NM_001190703.1        |
| 21673                                 | Dntt          | NM_001043228.1        |
| 75465                                 | Dynlrb2       | NM_029297.            |
| 105418                                | E330034G19Rik | NM_001033214.2        |
| 77767                                 | Ermn          | NM_029972.3           |
| 16204                                 | Fabp6         | NM_008375.2           |
| 14347                                 | Fut7          | NM_001177366.1        |
| 14531                                 | Gcm1          | NM_008103.3           |

|        |          |                |
|--------|----------|----------------|
| 76743  | Gje1     | NM_029722.1    |
| 14780  | Gpx5     | NM_010343.2    |
| 75512  | Gpx6     | NM_145451.3    |
| 68312  | Gstm7    | NM_001356351.1 |
| 232493 | Gys2     | NM_145572.2    |
| 14939  | Gzmb     | NM_013542.3    |
| 15492  | Hsd3b1   | NM_001304800.1 |
| 16069  | Igj      | NM_152839.3    |
| 16334  | Ins2     | NM_001185083.2 |
| 233752 | Insc     | NM_173767.3    |
| 16399  | Itga2b   | NM_010575.2    |
| 17992  | Itih3    | NM_008407.2    |
| 16533  | Kcnmb1   | NM_031169.4    |
| 13648  | Klk1b9   | NM_010116.1    |
| 268482 | Krt12    | NM_010661.2    |
| 16682  | Krt4     | NM_008475.2    |
| 227630 | Lcn11    | NM_001100455.2 |
| 16858  | Lgals7   | NM_008496.4    |
| 17195  | Mbl2     | NM_010776.1    |
| 17844  | Mup5     | NM_008649.2    |
| 17897  | Myl3     | NM_001364484.1 |
| 17926  | Myoc     | NM_010865.3    |
| 67405  | Nts      | NM_024435.2    |
| 18379  | Omt2a    | NM_001111286.2 |
| 242726 | Padi6    | NM_153106.2    |
| 10982  | Pgc      | NM_025973.3    |
| 18716  | Pip      | NM_008843.4    |
| 57749  | Piwil1   | NM_021311.3    |
| 69836  | Pla2g12b | NM_023530.2    |
| 18778  | Pla2g1b  | NM_001356586.1 |
| 18976  | Pomc     | NM_001278581.1 |
| 18776  | Prl3b1   | NM_008865.3    |
| 72373  | Psca     | NM_028216.2    |
| 217212 | Pyx      | NM_001346771.1 |
| 109222 | Rarres1  | NM_001164763.1 |
| 63954  | Rbp7     | NM_022020.2    |
| 19674  | Rcvrn    | NM_009038.2    |
| 20284  | Scrg1    | NM_009136.     |
| 20706  | Serpib9b | NM_011452.2    |
| 93806  | Serpib9g | NM_011455.     |
| 20389  | Sftpc    | NM_011359.2    |
| 382113 | Slc22a14 | NM_001037749.2 |
| 209837 | Slc38a5  | NM_172479.3    |
| 20763  | Sprr2i   | NM_011475.3    |
| 20765  | Sprr2k   | NM_011477.3    |
| 21334  | Tac2     | NM_001199971.1 |
| 21823  | Th       | NM_009377.2    |
| 22074  | Try4     | NM_011646.5    |

|        |         |                |
|--------|---------|----------------|
| 76670  | Ttc18   | NM_001163638.1 |
| 72094  | Ugt2a3  | NM_028094.3    |
| 242122 | Vtcn1   | NM_178594.3    |
| 71860  | Wdr16   | NM_027963.2    |
| 114602 | Zmynd10 | NM_001364526.1 |

| FEZF2_dependent_AIRE_independent TRAs |             |                       |
|---------------------------------------|-------------|-----------------------|
| Gene ID                               | Gene symbol | mRNA Accession number |
| 108956                                | Apol7c      | NM_175391.4           |
| 12307                                 | Calb1       | NM_009788.4           |
| 12810                                 | Coch        | NM_001198835.1        |
| 12140                                 | Fabp7       | NM_021272.3           |
| 15002                                 | H2-Ob       | NM_010389.3           |
| 68678                                 | Smtnl1      | NM_024230.2           |
| 69083                                 | Sult1c2     | NM_026935.4           |

| AIRE_dependent_FEZF2_dependent TRAs |             |                       |
|-------------------------------------|-------------|-----------------------|
| Gene ID                             | Gene symbol | mRNA Accession number |
| 11806                               | Apoa1       | NM_009692.4           |
| 11808                               | Apoa4       | NM_007468.2           |
| 11813                               | Apoc2       | NM_001277944.1        |
| 12308                               | Calb2       | NM_007586.1           |
| 73708                               | Dppa3       | NM_139218.1           |
| 21884                               | Fabp9       | NM_011598.3           |
| 14864                               | Gstm3       | NM_010359.2           |
| 18478                               | Pah         | NM_008777.3           |
| 19692                               | Reg1        | NM_009042.2           |
| 20209                               | Saa2        | NM_001357491.1        |

| AIRE_independent_FEZF2_independent TRAs |               |                       |
|-----------------------------------------|---------------|-----------------------|
| Gene ID                                 | Gene symbol   | mRNA Accession number |
| 74230                                   | 1700016K19Rik | NM_198637.2           |
| 69528                                   | 1700030J22Rik | NM_001357253.1        |
| 235973                                  | A630095E13Rik | NM_001033325.2        |
| 18670                                   | Abcb4         | NM_008830.2           |
| 100705                                  | Acacb         | NM_133904.2           |
| 11489                                   | Adam12        | NM_007400.2           |
| 110751                                  | Adam33        | NM_001163529.2        |
| 11516                                   | Adcyap1       | NM_001315503.1        |
| 329738                                  | Aknad1        | NM_177859.3           |
| 11812                                   | Apoc1         | NM_001110009.2        |
| 11945                                   | Atp4b         | NM_009724.2           |
| 20877                                   | Aurkb         | NM_011496.2           |
| 68127                                   | B230217C12Rik | NM_001080935.1        |
| 27062                                   | Cadps         | NM_001042617.1        |
| 12310                                   | Calca         | NM_001033954.3        |
| 116903                                  | Calcb         | NM_054084.2           |
| 20296                                   | Ccl2          | NM_011333.3           |

|        |         |                |
|--------|---------|----------------|
| 20304  | Ccl5    | NM_013653.3    |
| 12500  | Cd3d    | NM_013487.3    |
| 12501  | Cd3e    | NM_007648.5    |
| 12525  | Cd8a    | NM_001081110.2 |
| 12526  | Cd8b1   | NM_009858.3    |
| 107934 | Celsr3  | NM_001359572.1 |
| 12649  | Chek1   | NM_007691.5    |
| 12265  | Ciita   | NM_001243760.2 |
| 57255  | Cldn13  | NM_020504.4    |
| 20256  | Clec11a | NM_009131.3    |
| 12919  | Crhbp   | NM_198408.3    |
| 11571  | Crisp1  | NM_009638.3    |
| 12960  | Crybb1  | NM_001312893.1 |
| 12991  | Csn2    | NM_001286020.1 |
| 12477  | Ctla4   | NM_001281976.1 |
| 13048  | Cux2    | NM_001312908.1 |
| 13363  | Dhh     | NM_007857.5    |
| 239133 | Dleu7   | NM_173419.2    |
| 252864 | Dusp15  | NM_001159376.1 |
| 242705 | E2f2    | NM_001305399.1 |
| 52679  | E2f7    | NM_001358560.1 |
| 13607  | Eda     | NM_001177937.1 |
| 69306  | Efcab9  | NM_027031.3    |
| 71877  | Efhc1   | NM_027974.1    |
| 215900 | Fam26f  | NM_175449.4    |
| 56636  | Fgf21   | NM_020013.4    |
| 14255  | Flt3    | NM_010229.2    |
| 242022 | Frem2   | NM_172862.3    |
| 11936  | Fxyd2   | NM_007503.3    |
| 14711  | Gnmt    | NM_010321.1    |
| 54672  | Gpr97   | NM_173036.3    |
| 14813  | Grin2c  | NM_010350.2    |
| 14998  | H2-DMa  | NM_001360530.1 |
| 14999  | H2-DMb1 | NM_010387.3    |
| 15000  | H2-DMb2 | NM_010388.4    |
| 381091 | H2-Eb2  | NM_001033978.3 |
| 15001  | H2-Oa   | NM_008206.2    |
| 84506  | Hamp    | NM_032541.2    |
| 330723 | Htra4   | NM_001081187.3 |
| 74096  | Hvcn1   | NM_001042489.2 |
| 16154  | Il10ra  | NM_001324486.1 |
| 16159  | Il12a   | NM_001159424.2 |
| 50929  | Il22    | NM_016971.2    |
| 404710 | Iqgap3  | NM_001033484.1 |
| 16425  | Itih2   | NM_010582.3    |
| 16551  | Kif11   | NM_010615.1    |
| 109242 | Kif24   | NM_024241.2    |
| 70810  | Krt25   | NM_133730.1    |

|        |           |                |
|--------|-----------|----------------|
| 16818  | Lck       | NM_001162432.1 |
| 568988 | Lrrc23    | NM_001302555.1 |
| 114332 | Lyve1     | NM_053247.4    |
| 17123  | Madcam1   | NM_001358785.1 |
| 17349  | Mlf1      | NM_001039543.2 |
| 17427  | Mns1      | NM_008613.3    |
| 228785 | Mylk2     | NM_001081044.2 |
| 213435 | Mylk3     | NM_001297612.1 |
| 18159  | Nppc      | NM_010933.5    |
| 18197  | Nsg2      | NM_001290680.1 |
| 236690 | Nyx       | NM_173415.4    |
| 67968  | Ooep      | NM_026480.3    |
| 78826  | P2ry10    | NM_001357810.1 |
| 18610  | Pdyn      | NM_001286502.1 |
| 18613  | Pecam1    | NM_001032378.2 |
| 57757  | Pglyrp2   | NM_001271476.1 |
| 104709 | Pik3r6    | NM_001004435.3 |
| 665270 | Plb1      | NM_001081407.1 |
| 19074  | Prg2      | NM_008920.4    |
| 53856  | Prg3      | NM_016914.2    |
| 19132  | Prph      | NM_001163588.1 |
| 229214 | Qrfpr     | NM_198192.2    |
| 19373  | Rag1      | NM_009019.2    |
| 12399  | Runx3     | NM_019732.2    |
| 20192  | Ryr3      | NM_001319156.1 |
| 66166  | S100a14   | NM_001163525.2 |
| 56788  | Scube2    | NM_020052.2    |
| 68054  | Serpina12 | NM_026535.2    |
| 71869  | Serpinb12 | NM_001199213.2 |
| 105355 | Slc17a3   | NM_001164743.1 |
| 66166  | Slc2a6    | NM_001163525.2 |
| 328059 | Slc7a15   | NM_001038660.2 |
| 20618  | Sncg      | NM_011430.3    |
| 74478  | Snx29     | NM_001290148.1 |
| 66042  | Sostdc1   | NM_025312.3    |
| 66722  | Spag16    | NM_001271533.1 |
| 20728  | Spic      | NM_011461.3    |
| 100689 | Spon2     | NM_133903.3    |
| 20257  | Stmn2     | NM_025285.2    |
| 20897  | Stra6     | NM_001162475.1 |
| 57765  | Tbx21     | NM_019507.2    |
| 21414  | Tcf7      | NM_001313981.1 |
| 217733 | Tmem63c   | NM_001361704.1 |
| 228775 | Trib3     | NM_175093.2    |
| 239364 | Tspyl5    | NM_001085421.1 |
| 22160  | Twist1    | NM_011658.2    |
| 328795 | Ubash3a   | NM_177823.4    |
| 24108  | Ubd       | NM_023137.3    |

|        |       |             |
|--------|-------|-------------|
| 109637 | Upk1a | NM_026815.2 |
| 100647 | Upk3b | NM_175309.4 |
