# Supplementary material for: Thymocytes trigger self-antigen-controlling pathways in immature medullary thymic epithelial stages
Source: eLife journal article supplement (doi:10.7554/elife.69982), 2022-01-14
Supplement: supp3 [file elife-69982-supp3-v2.pdf]

Supplementary file 3

| AIRE_dependent_FEZF2_independent TRAs |               |                       |
|---------------------------------------|---------------|-----------------------|
| Gene ID                               | Gene symbol   | mRNA Accession number |
| 67082                                 | 1700011H14Rik | NM_025956.4           |
| 66732                                 | 4921530L21Rik | NM_001358241.1        |
| 319942                                | A530016L24Rik | NM_177039.4           |
| 239435                                | Aard          | NM_175503.3           |
| 219033                                | Ang4          | NM_177544.4           |
| 11998                                 | Avp           | NM_009732.2           |
| 212989                                | Best2         | NM_001130194.1        |
| 12163                                 | Bmp8a         | NM_001256019.1        |
| 29866                                 | Cabp2         | NM_001160253.1        |
| 20297                                 | Ccl20         | NM_001159738.1        |
| 20307                                 | Ccl8          | NM_021443.3           |
| 386463                                | Cdsn          | NM_001008424.2        |
| 71601                                 | Ceacam20      | NM_027839.2           |
| 109791                                | Clps          | NM_001317065.1        |
| 12903                                 | Crabp1        | NM_001284507.1        |
| 208677                                | Creb3l3       | NM_145365.3           |
| 13012                                 | Cst8          | NM_009978.2           |
| 55985                                 | Cxcl13        | NM_018866.2           |
| 13070                                 | Cyp11a1       | NM_001346787.1        |
| 13075                                 | Cyp19a1       | NM_001348171.1        |
| 13076                                 | Cyp1a1        | NM_001136059.2        |
| 13077                                 | Cyp1a2        | NM_009993.3           |
| 13087                                 | Cyp2a5        | NM_007812.4           |
| 68171                                 | D730048I06Rik | NM_026593.3           |
| 13206                                 | Ddx4          | NM_001145885.1        |
| 50722                                 | Dkk1          | NM_015789.3           |
| 13386                                 | Dlk1          | NM_001190703.1        |
| 15572                                 | Elavl4        | NM_001038698.1        |
| 207393                                | Elfn2         | NM_001358692.1        |
| 270162                                | Elmod1        | NM_177769.4           |
| 75429                                 | Fam183b       | NM_001162878.2        |
| 229499                                | Fcrl1         | NM_001136236.1        |
| 14170                                 | Fgf15         | NM_008003.2           |
| 14526                                 | Gcg           | NM_008100.4           |
| 14607                                 | Gip           | NM_008119.2           |
| 66283                                 | Gkn1          | NM_025466.1           |
| 66284                                 | Gkn2          | NM_025467.1           |
| 14765                                 | Gpr50         | NM_001308501.1        |
| 14916                                 | Guca2b        | NM_008191.2           |
| 14939                                 | Gzmb          | NM_013542.3           |
| 15162                                 | Hck           | NM_001172117.1        |
| 72927                                 | Hepacam       | NM_175189.4           |
| 101202                                | Hepacam2      | NM_178899.5           |
| 15408                                 | Hoxb13        | NM_008267.4           |

|        |          |                |
|--------|----------|----------------|
| 15492  | Hsd3b1   | NM_001304800.1 |
| 72413  | Kcnmb2   | NM_028231.2    |
| 19144  | Klk6     | NM_001164696.1 |
| 23993  | Klk7     | NM_011872.3    |
| 16644  | Kng1     | NM_001102411.1 |
| 433619 | Kprp     | NM_028629.1    |
| 406220 | Krt77    | NM_006521140.1 |
| 332131 | Krt78    | NM_212487.4    |
| 328789 | Lhfp15   | NM_026571.2    |
| 17182  | Matn3    | NM_010770.4    |
| 50997  | Mpp2     | NM_001356324.1 |
| 14126  | Ms4a2    | NM_001276328.1 |
| 17771  | Mtl5     | NM_001039657.2 |
| 18133  | Nov      | NM_010930.4    |
| 23958  | Nr2e3    | NM_013708.4    |
| 67405  | Nts      | NM_024435.2    |
| 100535 | Oas1d    | NM_133893.3    |
| 21906  | Otop1    | NM_172709.3    |
| 109820 | Pgc      | NM_025973.3    |
| 53906  | Phgr1    | NM_001145644.1 |
| 18976  | Pomc     | NM_001278581.1 |
| 22264  | Prap1    | NM_009475.2    |
| 69814  | Prss32   | NM_027220.2    |
| 19259  | Ptpn5    | NM_001163565.1 |
| 19662  | Rbp4     | NM_001159487.1 |
| 19694  | Reg3a    | NM_011259.1    |
| 18489  | Reg3b    | NM_011036.1    |
| 19695  | Reg3g    | NM_011260.2    |
| 67709  | Reg4     | NM_026328.2    |
| 67792  | Rgs8     | NM_001347115.1 |
| 19752  | Rnase1   | NM_011271.2    |
| 104582 | Rprml    | NM_001033212.2 |
| 380683 | Sec14l3  | NM_001029937.2 |
| 20706  | Serpib9b | NM_011452.2    |
| 210027 | Slc35f3  | NM_001363500.1 |
| 209837 | Slc38a5  | NM_172479.3    |
| 28250  | Slco1a4  | NM_001355577.1 |
| 57277  | Slurp1   | NM_020519.1    |
| 20754  | Sprr1b   | NM_009265.3    |
| 20604  | Sst      | NM_009215.1    |
| 56362  | Sult1b1  | NM_001356943.1 |
| 72003  | Synpr    | NM_001163032.1 |
| 21334  | Tac2     | NM_001199971.1 |
| 21338  | Tacr3    | NM_021382.6    |
| 21786  | Tff3     | NM_011575.2    |
| 208613 | Tmem212  | NM_001164437.1 |
| 50930  | Tnfsf14  | NM_019418.3    |
| 329278 | Tnn      | NM_177839.3    |

|        |        |                |
|--------|--------|----------------|
| 195359 | Trim40 | NM_001033235.3 |
| 76670  | Ttc18  | NM_001163638.1 |
| 242800 | Ttc34  | NM_172878.3    |
| 192653 | Ttc36  | NM_138951.1    |

| FEZF2_dependent_AIRE_independent TRAs |             |                       |
|---------------------------------------|-------------|-----------------------|
| Gene ID                               | Gene symbol | mRNA Accession number |
| 108956                                | Apol7c      | NM_175391.4           |
| 68891                                 | Cd177       | NM_026862.3           |
| 12565                                 | Cdh9        | NM_009869.1           |
| 12140                                 | Fabp7       | NM_021272.3           |
| 54713                                 | Fezf2       | NM_080433.3           |
| 71520                                 | Grap        | NM_027817.3           |
| 72585                                 | Lypd1       | NM_001311089.1        |
| 17287                                 | Mep1a       | NM_008585.2           |
| 319211                                | Nol4        | NM_001161483.1        |
| 246313                                | Prokr2      | NM_144944.3           |
| 19711                                 | Resp18      | NM_009049.2           |
| 246709                                | Rgs13       | NM_153171.4           |
| 72902                                 | Spock3      | NM_001252620.1        |
| 69083                                 | Sult1c2     | NM_026935.4           |
| 241556                                | Tspan18     | NM_183180.2           |

| AIRE_dependent_FEZF2_dependent TRAs |               |                       |
|-------------------------------------|---------------|-----------------------|
| Gene ID                             | Gene symbol   | mRNA Accession number |
| 78354                               | 2210407C18Rik | NM_144544.2           |
| 230163                              | Aldob         | NM_144903.3           |
| 11806                               | Apoa1         | NM_009692.4           |
| 11808                               | Apoa4         | NM_007468.2           |
| 11813                               | Apoc2         | NM_001277944.1        |
| 12319                               | Car8          | NM_007592.3           |
| 268663                              | Cdhr2         | NM_001033364.3        |
| 13009                               | Csrp3         | NM_001198841.1        |
| 21884                               | Fabp9         | NM_011598.3           |
| 78354                               | Myh3          | NM_144544.2           |
| 243262                              | Oas1f         | NM_145153.3           |
| 18478                               | Pah           | NM_008777.3           |
| 20208                               | Saa1          | NM_001357493.         |
| 20210                               | Saa3          | NM_011315.3           |
| 66198                               | Them5         | NM_025416.3           |
| 226654                              | Tstd1         | NM_001164525.1        |

| AIRE_independent_FEZF2_independent TRAs |               |                       |
|-----------------------------------------|---------------|-----------------------|
| Gene ID                                 | Gene symbol   | mRNA Accession number |
| 71775                                   | 1300017J02Rik | NM_027918.2           |
| 72301                                   | 1810041L15Rik | NM_001163145.1        |
| 70291                                   | 2510049J12Rik | NM_001101431.1        |
| 69865                                   | A1cf          | NM_001081074.1        |

|        |          |                |
|--------|----------|----------------|
| 100705 | Acacb    | NM_133904.2    |
| 11423  | Ache     | NM_001290010.1 |
| 11474  | Actn3    | NM_013456.2    |
| 231821 | Adap1    | NM_006504669.2 |
| 432530 | Adcy1    | NM_009622.1    |
| 11548  | Adra1b   | NM_001284380.1 |
| 11689  | Alox5    | NM_009662.2    |
| 68737  | Angel1   | NM_144524.2    |
| 71872  | Aox4     | NM_023631.2    |
| 56380  | Arid3b   | NM_019689.2    |
| 17172  | Ascl1    | NM_008553.5    |
| 67855  | Asprv1   | NM_026414.2    |
| 11567  | Avil     | NM_009635.3    |
| 93961  | B3galt5  | NM_001122993.1 |
| 12022  | Barx1    | NM_007526.4    |
| 12038  | Bche     | NM_009738.3    |
| 12169  | Bmx      | NM_009759.4    |
| 207777 | Bzrap1   | NM_172449.2    |
| 72709  | C1qtnf6  | NM_001204152.1 |
| 12287  | Cacna1b  | NM_001042528.2 |
| 12292  | Cacna1s  | XM_006529106.2 |
| 27062  | Cadps    | NM_001042617.1 |
| 12310  | Calca    | NM_001033954.3 |
| 116903 | Calcb    | NM_054084.2    |
| 80796  | Calm4    | NM_020036.4    |
| 434778 | Ccdc160  | NM_001034059.1 |
| 24047  | Ccl19    | NM_011888.2    |
| 12467  | Cct6b    | NM_001291242.1 |
| 21939  | Cd40     | NM_011611.2    |
| 15985  | Cd79b    | NM_001313939.1 |
| 12564  | Cdh8     | NM_001039154.2 |
| 72040  | Cdhr5    | NM_001114322.1 |
| 12590  | Cdx1     | NM_009880.3    |
| 26366  | Ceacam10 | NM_007675.4    |
| 18636  | Cfp      | NM_008823.4    |
| 12647  | Chat     | NM_009891.2    |
| 229933 | Clca2    | XM_006501432.3 |
| 362053 | Clca4    | NM_201419.1    |
| 57255  | Cldn13   | NM_020504.4    |
| 212070 | Clrn3    | NM_178669.5    |
| 69700  | Col22a1  | NM_027174.1    |
| 11571  | Crisp1   | NM_009638.3    |
| 12944  | Crp      | NM_007768.4    |
| 54698  | Crtam    | NM_001281954.1 |
| 12971  | Crym     | NM_016669.2    |
| 12983  | Csf2rb   | NM_001358854.1 |
| 12991  | Csn2     | NM_001286020.1 |
| 73720  | Cst6     | NM_028623.5    |

|        |               |                |
|--------|---------------|----------------|
| 68588  | Cthrc1        | NM_026778.2    |
| 15945  | Cxcl10        | NM_021274.2    |
| 17329  | Cxcl9         | NM_008599.4    |
| 13074  | Cyp17a1       | NM_007809.3    |
| 13370  | Dio1          | NM_007860.4    |
| 239133 | Dleu7         | NM_173419.2    |
| 54485  | Dll4          | NM_019454.3    |
| 269109 | Dpp10         | NM_199021.3    |
| 13510  | Dsg1a         | NM_010079.2    |
| 103551 | E130012A19Rik | NM_175332.3    |
| 242705 | E2f2          | NM_001305399.1 |
| 268780 | Egflam        | NM_001289496.1 |
| 112407 | Egln3         | NM_028133.2    |
| 13807  | Eno2          | NM_001302642.1 |
| 71920  | Epgn          | NM_053087.2    |
| 56226  | Espn          | NM_019585.3    |
| 69627  | Fam89a        | NM_001081120.1 |
| 80891  | Fcrls         | NM_030707.3    |
| 14159  | Fes           | NM_010194.2    |
| 59083  | Fetub         | NM_001083904.1 |
| 73191  | Fezf1         | NM_028462.1    |
| 232237 | Fgd5          | NM_172731.3    |
| 14169  | Fgf14         | NM_010201.4    |
| 56636  | Fgf21         | NM_020013.4    |
| 15223  | Foxj1         | NM_008240.3    |
| 14344  | Fut2          | NM_001271993.1 |
| 210710 | Gab3          | NM_181584.4    |
| 228858 | Gdap1l1       | NM_144891.2    |
| 83408  | Gimap3        | NM_031247.3    |
| 14695  | Gnb3          | NM_013530.1    |
| 64337  | Gng13         | NM_001357782.1 |
| 238377 | Gpr68         | NM_001177673.1 |
| 15109  | Hal           | NM_010401.4    |
| 15114  | Hap1          | NM_001359052.1 |
| 15464  | Hrc           | NM_010473.2    |
| 330723 | Htra4         | NM_001081187.3 |
| 16005  | Igfals        | NM_001364895.1 |
| 16159  | Il12a         | NM_001159424.2 |
| 16178  | Il1r2         | NM_001360800.1 |
| 53626  | Insm1         | NM_016889.3    |
| 27056  | Irf5          | NM_001252382.1 |
| 16429  | Itln1         | NM_010584.3    |
| 57339  | Jph1          | NM_020604.2    |
| 60613  | Kcnq4         | NM_001081142.2 |
| 242721 | Klhdc7a       | NM_173427.2    |
| 50928  | Klrg1         | NM_016970.1    |
| 76484  | Kndc1         | NM_177261.4    |
| 66809  | Krt20         | NM_023256.2    |

|        |           |                |
|--------|-----------|----------------|
| 75706  | Krt24     | NM_029393.2    |
| 15450  | Lipc      | NM_001324472.1 |
| 76113  | Lpo       | NM_080420.2    |
| 16970  | Lrmp      | NM_001281980.1 |
| 268747 | Lrrc16b   | NM_001024645.2 |
| 16992  | Lta       | NM_010735.2    |
| 17001  | Ltc4s     | NM_001313968.1 |
| 17005  | Ltk       | NM_008523.2    |
| 217721 | Mfsd7c    | NM_145447.2    |
| 17395  | Mmp9      | NM_013599.4    |
| 17922  | Myo7b     | NM_032394.3    |
| 17928  | Myog      | NM_031189.2    |
| 74513  | Neto2     | NM_001081324.2 |
| 269116 | Nfasc     | NM_001160316.1 |
| 217431 | Nol10     | NM_001008421.1 |
| 18126  | Nos2      | NM_001313921.1 |
| 18231  | Nxph1     | NM_008751.5    |
| 380924 | Olfm4     | NM_001351947.1 |
| 57757  | Pglyrp2   | NM_001271476.1 |
| 320207 | Pik3r5    | NM_177320.2    |
| 85031  | Pla1a     | XM_006522771.1 |
| 26971  | Pla2g2f   | NM_001360875.1 |
| 434128 | Pnmal2    | NM_001099636.2 |
| 18985  | Pou2af1   | NM_011136.2    |
| 56635  | Prl2a1    | NM_019991.1    |
| 71373  | Prr16     | NM_001081224.2 |
| 19227  | Pthlh     | NM_008970.4    |
| 20459  | Ptk6      | NM_001356304.1 |
| 56089  | Ramp3     | NM_019511.3    |
| 75141  | Rasd2     | NM_029182.1    |
| 320100 | Relt      | NM_001358914.1 |
| 51791  | Rgs14     | NM_001360714.1 |
| 56533  | Rgs17     | NM_001161822.1 |
| 20129  | Rptn      | NM_009100.2    |
| 72780  | Rspo3     | NM_028351.3    |
| 104001 | Rtn1      | NM_001007596.2 |
| 235281 | Scn3b     | NM_001083917.1 |
| 70061  | Sdr9c7    | NM_027301.3    |
| 68054  | Serpina12 | NM_026535.2    |
| 20720  | Serpina7  | NM_009255.4    |
| 71869  | Serpina12 | NM_001199213.2 |
| 11905  | Serpinc1  | NM_080844.4    |
| 20370  | Sez6      | NM_001291225.1 |
| 230613 | Skint10   | NM_177668.2    |
| 227659 | Slc2a6    | NM_001177627.1 |
| 239250 | Slitrk6   | NM_175499.4    |
| 276829 | Smtnl2    | NM_177776.3    |
| 20618  | Sncg      | NM_011430.3    |

|        |           |                |
|--------|-----------|----------------|
| 223227 | Sox21     | NM_177753.3    |
| 272382 | Spib      | NM_019866.1    |
| 100689 | Spon2     | NM_133903.3    |
| 68792  | Srpx2     | NM_001083895.3 |
| 240119 | St6gal2   | NM_001347403.1 |
| 20897  | Stra6     | NM_001162475.1 |
| 20979  | Syt1      | NM_001252341.1 |
| 21384  | Tbx15     | NM_009323.2    |
| 57765  | Tbx21     | NM_019507.2    |
| 210417 | Thsd7b    | NM_172485.3    |
| 75604  | Tm4sf5    | NM_029360.3    |
| 18383  | Tnfrsf11b | NM_008764.3    |
| 21956  | Tnnt2     | NM_001130174.2 |
| 21957  | Tnnt3     | NM_001163664.1 |
| 28240  | Trpm2     | NM_138301.2    |
| 208634 | Tspan10   | NM_145363.2    |
| 69737  | Ttl       | NM_027192.2    |
| 237858 | Tusc5     | NM_177709.3    |
| 24108  | Ubd       | NM_023137.3    |
| 212190 | Ubxn10    | NM_001285928.1 |
| 226841 | Vash2     | NM_144879.2    |
| 381677 | Vgf       | NM_001039385.1 |
