# Supplementary material for: Thymocytes trigger self-antigen-controlling pathways in immature medullary thymic epithelial stages
Source: eLife journal article supplement (doi:10.7554/elife.69982), 2022-01-14
Supplement: supp4 [file elife-69982-supp4-v1.pdf]

## Supplementary file 4

|                                    | Gene Symbol                                                      | Name                                                                           | Target organ                   | Fold change | P value |
|------------------------------------|------------------------------------------------------------------|--------------------------------------------------------------------------------|--------------------------------|-------------|---------|
| <b>Aire-dependent TRAs</b>         | Acrv1                                                            | acrosomal vesicle protein 1                                                    | testis                         | 6.0784      | 0.0004  |
|                                    | Akr1c18                                                          | aldo-keto reductase family 1, member C18                                       | adrenal - ovary                | 3.1567      | 0.0257  |
|                                    | Alpl                                                             | alkaline phosphatase                                                           | intestine                      | 12.8717     | 0.0154  |
|                                    | Alpl                                                             | alkaline phosphatase                                                           | liver-kidney-bone              | 3.9276      | 0.0305  |
|                                    | Alx3                                                             | aristalless-like homeobox 3                                                    | limb-CNS                       | 10.1196     | 0.0146  |
|                                    | Aox3                                                             | aldehyde oxidase 3                                                             | liver                          | 3.5179      | 0.0390  |
|                                    | Apoa2                                                            | apolipoprotein A-II                                                            | liver                          | 5.5895      | 0.0448  |
|                                    | Arhgap20                                                         | Rho GTPase activating protein 20                                               | brain                          | 4.4964      | 0.0186  |
|                                    | Ay761184                                                         | cDNA sequence AY761184provided                                                 | intestine                      | 17.5496     | 0.0274  |
|                                    | C1qtnf3                                                          | C1q and tumor necrosis factor related protein 3                                | limb                           | 3.7111      | 0.0129  |
|                                    | Ccdc67 (deup1)                                                   | deuterosome assembly protein 1                                                 | testis                         | 17.5496     | 0.0274  |
|                                    | Ccl17                                                            | chemokine (C-C motif) ligand 17                                                | lung                           | 3.6806      | 0.0350  |
|                                    | Ccl22                                                            | chemokine (C-C motif) ligand 22                                                | thymus - mammary gland         | 3.8790      | 0.0045  |
|                                    | Ccno                                                             | cyclin o                                                                       | ovary                          | 2.3969      | 0.0304  |
|                                    | Cd209a                                                           | Cd209a antigen                                                                 | bladder-mammary gland          | 2.2155      | 0.0425  |
|                                    | Cd209d                                                           | Cd209d antigen                                                                 | mammary gland                  | 4.7161      | 0.0131  |
|                                    | Cd209f                                                           | Cd209f antigen                                                                 | mammary gland                  | 6.6064      | 0.0008  |
|                                    | Ceacam11                                                         | carcinoembryonic antigen-related cell adhesion molecule 11                     | placenta                       | 9.3129      | 0.0001  |
|                                    | Cfap52                                                           | cilia and flagella associated protein 52                                       | testis - lung                  | 2.9049      | 0.0402  |
|                                    | Cfap70                                                           | cilia and flagella associated protein 70                                       | testis - lung                  | 2.7668      | 0.0281  |
|                                    | Clec4d                                                           | C-type lectin domain family 4, member d                                        | liver-lung                     | 5.5594      | 0.0087  |
|                                    | Clec4f                                                           | C-type lectin domain family 4, member f                                        | liver                          | 7.5307      | 0.0001  |
|                                    | Cpb1                                                             | carboxypeptidase B1                                                            | intestine - spleen             | 12.3771     | 0.0001  |
|                                    | Cpne6                                                            | Copine 6                                                                       | brain                          | 6.5138      | 0.0290  |
|                                    | Crap1                                                            | cellular retinoic acid binding protein 1                                       | limb-CNS                       | 5.2032      | 0.0076  |
|                                    | Crh                                                              | corticotropin releasing hormone                                                | brain                          | 7.9154      | 0.0318  |
|                                    | Cryaa                                                            | crystallin, alpha A                                                            | placenta - lung                | 9.5242      | 0.0110  |
|                                    | Csdc2                                                            | cold shock domain containing C2                                                | brain                          | 4.1945      | 0.0178  |
|                                    | Ctsj                                                             | cathepsin J                                                                    | placenta                       | 8.7019      | 0.0006  |
|                                    | Cxcl13                                                           | chemokine (C-X-C motif) ligand 13                                              | spleen - mammary gland         | 4.3369      | 0.0047  |
|                                    | Cyp11b1                                                          | cytochrome P450 family 11 subfamily B member 1                                 | adrenal                        | 5.4150      | 0.0001  |
|                                    | Cyp1a2                                                           | cytochrome P450, family 1, subfamily a, polypeptide 2                          | liver                          | 7.4701      | 0.0312  |
|                                    | Defa22                                                           | defensin, alpha, 22                                                            | intestine                      | 6.3110      | 0.0102  |
|                                    | Dlk1                                                             | delta like non-canonical Notch ligand 1                                        | limb - liver                   | 4.0610      | 0.0080  |
|                                    | Dnnt1                                                            | deoxynucleotidyltransferase, terminal                                          | thymus - bone marrow           | 5.5567      | 0.0003  |
|                                    | Dynlrb2                                                          | dynein light chain roadblock-type 2                                            | testis - lung                  | 2.6935      | 0.0139  |
|                                    | Ernm                                                             | ermin                                                                          | brain                          | 6.1440      | 0.0021  |
|                                    | Fabp6                                                            | fatty acid binding protein 6, ileal                                            | intestine                      | 7.5368      | 0.0014  |
|                                    | Fut7                                                             | fucosyltransferase 7                                                           | mammary gland                  | 5.2695      | 0.0264  |
|                                    | Gcm1                                                             | glial cells missing homolog 1                                                  | placenta - kidney              | 6.0454      | 0.0003  |
|                                    | Gm6289 (Clca4-cs)                                                | chloride channel accessory 4C, pseudogene                                      | intestine                      | 10.2502     | 0.0004  |
|                                    | Gpx5                                                             | glutathione peroxidase 5                                                       | genital fat pad adult          | 4.7482      | 0.0010  |
|                                    | Gpx6                                                             | glutathione peroxidase 6                                                       | testis - genital fat pad adult | 2.9562      | 0.0281  |
|                                    | Gstm7                                                            | glutathione S-transferase, mu 7                                                | liver                          | 3.1482      | 0.0480  |
|                                    | Gys2                                                             | glycogen synthase 2                                                            | liver                          | 11.6204     | 0.0207  |
|                                    | Gzmb                                                             | granzyme B                                                                     | intestine                      | 5.1285      | 0.0450  |
|                                    | Hsd3b1                                                           | hydroxy-delta-5-steroid dehydrogenase, 3 beta-and steroid delta-isomerase 1    | adrenal - ovary                | 4.0601      | 0.0001  |
|                                    | Ig1 (Ichain)                                                     | immunoglobulin joining chain                                                   | intestine                      | 2.2039      | 0.0003  |
|                                    | Insl2                                                            | insulin 2                                                                      | duodenum - colon               | 5.2671      | 0.0367  |
|                                    | Insc                                                             | NSC spindle orientation adaptor protein                                        | liver                          | 6.9385      | 0.0332  |
|                                    | Ith3                                                             | inter-alpha trypsin inhibitor, heavy chain 3                                   | liver                          | 6.6714      | 0.0347  |
|                                    | Kcrrmb1                                                          | potassium large conductance calcium-activated channel, subfamily M, beta membe | bladder - ovary                | 3.5618      | 0.0335  |
|                                    | Klik1b9                                                          | kallikrein 1-related peptidase b9                                              | testis-kidney                  | 4.8768      | 0.0115  |
|                                    | Krt12                                                            | keratin 12                                                                     | brain                          | 9.1004      | 0.0174  |
|                                    | Krt4                                                             | keratin 4                                                                      | lung - stomach                 | 2.5004      | 0.0404  |
|                                    | Lgals7                                                           | lectin, galactose binding, soluble 7                                           | stomach-lung                   | 2.5533      | 0.0101  |
|                                    | Mbi2                                                             | mannose-binding lectin (protein C) 2                                           | liver                          | 34.9644     | 0.0235  |
|                                    | Mup5                                                             | major urinary protein 5                                                        | liver                          | 7.7335      | 0.0004  |
|                                    | Myh3                                                             | myosin, light polypeptide 3                                                    | heart                          | 12.4529     | 0.0025  |
|                                    | Myoc                                                             | myocilin                                                                       | bladder- brain                 | 5.4003      | 0.0001  |
|                                    | Nts                                                              | neurotensin                                                                    | intestine                      | 4.5164      | 0.0040  |
|                                    | Pad16                                                            | peptidyl arginine deiminase, type VI                                           | ovary                          | 10.0716     | 0.0001  |
| Pgc                                | progastricins                                                    | duodenum                                                                       | 12.2141                        | 0.0005      |         |
| Piwi1                              | piwi-like RNA-mediated gene silencing 1                          | testis                                                                         | 5.1661                         | 0.0001      |         |
| Pla2g12b                           | phospholipase A2, group XIIB                                     | placenta - intestine                                                           | 8.5702                         | 0.0002      |         |
| Pla2g1b                            | phospholipase A2, group IB                                       | stomach                                                                        | 6.7422                         | 0.0340      |         |
| Pomc                               | pro-opiomelanocortin-alpha                                       | testis - CNS                                                                   | 13.8359                        | 0.0004      |         |
| Prl3b1                             | prolactin family 3, subfamily b, member 1                        | placenta                                                                       | 13.3400                        | 0.0005      |         |
| Psc                                | prostate stem cell antigen                                       | stomach                                                                        | 2.6411                         | 0.0305      |         |
| Pyy                                | peptide YY                                                       | colon - intestine                                                              | 3.1392                         | 0.0243      |         |
| Rarres1                            | retinoic acid receptor responder (tazarotene induced) 1          | liver - genital fat pat                                                        | 5.0124                         | 0.0016      |         |
| Rbp7                               | retinol binding protein 7, cellular                              | fat pad - heart                                                                | 21.9595                        | 0.0232      |         |
| Scrg1                              | scrapie responsive gene 1                                        | brain                                                                          | 13.5691                        | 0.0001      |         |
| Serpinc9b                          | serine (or cysteine) peptidase inhibitor, clade B, member 9b     | placenta                                                                       | 15.0183                        | 0.0108      |         |
| Serpinc9g                          | serine (or cysteine) peptidase inhibitor, clade B, member 9g     | placenta                                                                       | 5.0895                         | 0.0003      |         |
| Sftpc                              | surfactant associated protein C                                  | lung                                                                           | 8.7768                         | 0.0383      |         |
| Slc22a14                           | solute carrier family 22 (organic cation transporter), member 14 | testis                                                                         | 4.2372                         | 0.0006      |         |
| Slc38a5                            | solute carrier family 38, member 5                               | fat pad - ovary                                                                | 9.0765                         | 0.0188      |         |
| Sprr2                              | small proline-rich protein 2I                                    | stomach                                                                        | 7.0334                         | 0.0397      |         |
| Tac2                               | tachykinin 2                                                     | liver                                                                          | 5.4785                         | 0.0103      |         |
| Tn                                 | tyrosine hydroxylase                                             | adrenal - brain                                                                | 5.3556                         | 0.0459      |         |
| Ugt2a3                             | UDP glucuronosyltransferase 2 family, polypeptide A3             | liver - duodenum                                                               | 6.8583                         | 0.0006      |         |
| Vtcn1                              | V-set domain containing T cell activation inhibitor 1            | fat pad - mammary gland                                                        | 4.1635                         | 0.0346      |         |
| Zmynd10                            | zinc finger, MYND domain containing 10                           | testis - kidney                                                                | 2.4660                         | 0.0397      |         |
| <b>Fezf2-dependent TRAs</b>        | Apol7c                                                           | apolipoprotein L 7c                                                            | intestine - spleen             | 10.0120     | 0.0104  |
|                                    | Calb1                                                            | calbindin 1                                                                    | cerebellum - kidney            | 3.2992      | 0.0439  |
|                                    | Coch                                                             | cochlin                                                                        | spleen - ovary                 | 3.8648      | 0.0150  |
|                                    | Fabp7                                                            | fatty acid binding protein 7                                                   | brain                          | 5.7656      | 0.0465  |
|                                    | H2-Ob                                                            | histocompatibility 2, O region beta locus                                      | spleen - mammary gland         | 11.3795     | 0.0001  |
|                                    | Smtnl1                                                           | smoothelin-like 1                                                              | testis - mammary gland         | 3.4961      | 0.0163  |
|                                    | Sult1c2                                                          | sulfotransferase family, cytosolic, 1C, member 2                               | kidney - stomach               | 3.4840      | 0.0061  |
| <b>Aire/Fezf2-dependent TRAs</b>   | Apoa1                                                            | apolipoprotein A-I                                                             | liver - duodenum               | 2.1950      | 0.0305  |
|                                    | Apoa4                                                            | apolipoprotein A-IV                                                            | duodenum - intestine           | 2.0612      | 0.0057  |
|                                    | Apoc2                                                            | apolipoprotein C - II                                                          | duodenum - intestine           | 3.3456      | 0.0204  |
|                                    | Calb2                                                            | calbindin 2                                                                    | brain                          | 14.6915     | 0.0091  |
|                                    | Fabp9                                                            | fatty acid binding protein 9                                                   | testis                         | 2.4346      | 0.0434  |
|                                    | Gstm3                                                            | glutathione S-transferase, mu 3                                                | duodenum - intestine           | 14.4119     | 0.0064  |
|                                    | Pah                                                              | phenylalanine hydroxylase                                                      | kidney - liver                 | 10.6327     | 0.0103  |
|                                    | Reg1                                                             | regenerating islet-derived 1                                                   | duodenum - intestine           | 7.2557      | 0.0005  |
|                                    | Saa2                                                             | serum amyloid A 2                                                              | colon - intestine              | 6.1821      | 0.0290  |
| <b>Aire/Fezf2-independent TRAs</b> | Abcb4                                                            | ATP-binding cassette, sub-family B (MDR/TAP), member 4                         | liver                          | 7.0771      | 0.0186  |
|                                    | Acacb                                                            | acetyl-Coenzyme A carboxylase beta                                             | heart - mammary gland          | 2.5406      | 0.0004  |
|                                    | Adam12                                                           | a disintegrin and metallopeptidase domain 12                                   | fat pad - mammary gland        | 2.6822      | 0.0455  |
|                                    | Adam33                                                           | a disintegrin and metallopeptidase domain 33                                   | bladder - limb                 | 3.1551      | 0.0338  |
|                                    | Adcyap1                                                          | adenylate cyclase activating polypeptide 1                                     | CNS                            | 12.1923     | 0.0137  |
|                                    | Aknad1                                                           | AKNA domain containing 1                                                       | testis                         | 7.0766      | 0.0318  |
|                                    | Apoc1                                                            | apolipoprotein C-I                                                             | liver                          | 2.1978      | 0.0024  |
|                                    | Atp4b                                                            | ATPase, H <sup>+</sup> /K <sup>+</sup> exchanging, beta polypeptide            | stomach                        | 8.1920      | 0.0284  |
|                                    | Aurkb                                                            | aurora kinase B                                                                | thymus - liver                 | 2.4643      | 0.0172  |
|                                    | Cadps                                                            | Ca <sup>2+</sup> -dependent secretion activator                                | CNS                            | 2.3406      | 0.0001  |
|                                    | Calca                                                            | calcitonin/calcitonin-related polypeptide, alpha                               | thymus - intestine             | 4.0207      | 0.0016  |
|                                    | Calcb                                                            | calcitonin/calcitonin-related polypeptide, beta                                | thymus - intestine             | 4.2556      | 0.0001  |
|                                    | Ccl2                                                             | chemokine (C-C motif) ligand 2                                                 | stomach                        | 3.1370      | 0.0300  |
|                                    | Ccl5                                                             | chemokine (C-C motif) ligand 5                                                 | intestine - mammary gland      | 2.3292      | 0.0188  |
|                                    | Cd3d                                                             | CD3 antigen, delta polypeptide                                                 | spleen                         | 7.3832      | 0.0324  |
|                                    | Cd3e                                                             | CD3 antigen, epsilon polypeptide                                               | thymus - spleen                | 4.8813      | 0.0029  |
|                                    | Cd8a                                                             | CD8 antigen, alpha chain                                                       | thymus - spleen                | 2.9968      | 0.0400  |
|                                    | Cd8b1                                                            | CD8 antigen, beta chain 1                                                      | thymus - spleen                | 3.6659      | 0.0442  |
|                                    | Celsr3                                                           | cadherin, EGF LAG seven-pass G-type receptor 3                                 | brain                          | 2.8167      | 0.0392  |
|                                    | Chek1                                                            | checkpoint kinase 1                                                            | CNS - liver                    | 4.2620      | 0.0077  |
|                                    | Clec11a                                                          | C-type lectin domain family 11, member a                                       | ovary-limb                     | 2.2969      | 0.0258  |
|                                    | Crhpb                                                            | corticotropin releasing hormone binding protein                                | brain                          | 2.1865      | 0.0399  |
|                                    | Ooep                                                             | oocyte expressed protein                                                       | bladder - ovary                | 3.1144      | 0.0019  |
|                                    | Crybb1                                                           | crystallin, beta B1                                                            | genital fat pad - ovary        | 6.2468      | 0.0489  |
|                                    | Csn2                                                             | casein beta                                                                    | intestine - mammary gland      | 3.8854      | 0.0001  |
|                                    | Ctla4                                                            | cytotoxic T-lymphocyte-associated protein 4                                    | thymus - spleen                | 6.6578      | 0.0192  |
|                                    | Lux2                                                             | cut-like homeobox 2                                                            | brain                          | 5.5350      | 0.0497  |

|           |                                                                                 |                        |         |        |
|-----------|---------------------------------------------------------------------------------|------------------------|---------|--------|
| Dhh       | desert hedgehog                                                                 | ovary - testis         | 4.3975  | 0.0234 |
| Dleu7     | deleted in lymphocytic leukemia. 7                                              | kidney - CNS           | 2.7752  | 0.0026 |
| Dusp15    | dual specificity phosphatase-like 15                                            | testis - cerebellum    | 5.6705  | 0.0162 |
| E2f2      | E2F transcription factor 2                                                      | thymus - liver         | 2.2243  | 0.0246 |
| E2f7      | E2F transcription factor 7                                                      | CNS - limb             | 2.8800  | 0.0348 |
| Eda       | ectodysplasin-A                                                                 | limb - fat pad         | 3.0075  | 0.0159 |
| Efcab9    | EF-hand calcium binding domain 9                                                | testis - spleen        | 5.2622  | 0.0331 |
| Efhc1     | EF-hand domain (C-terminal) containing 1                                        | testis - ovary         | 2.3821  | 0.0157 |
| Fam26f    | family with sequence similarity 26, member F                                    | spleen - mammary gland | 3.4818  | 0.0344 |
| Fgf21     | fibroblast growth factor 21                                                     | thymus - testis        | 2.6972  | 0.0001 |
| Flt3      | FMS-like tyrosine kinase 3                                                      | cerebellum - spleen    | 4.3569  | 0.0144 |
| Frem2     | Fras1 related extracellular matrix protein 2                                    | limb - bladder         | 2.7537  | 0.0433 |
| Fxyd2     | FXD domain-containing ion transport regulator 2                                 | kidney                 | 2.0758  | 0.0049 |
| Gnmt      | glycine N-methyltransferase                                                     | liver                  | 3.6679  | 0.0337 |
| Grin2c    | glutamate receptor, ionotropic, NMDA2C (epsilon 3)                              | cerebellum - brain     | 2.5578  | 0.0038 |
| H2-DMa    | histocompatibility 2, class II, locus DMA                                       | spleen - intestine     | 2.7030  | 0.0001 |
| H2-DMb1   | histocompatibility 2, class II, locus Mb1                                       | spleen - intestine     | 2.4298  | 0.0001 |
| H2-DMb2   | histocompatibility 2, class II, locus Mb2                                       | spleen - mammary gland | 8.5206  | 0.0001 |
| H2-Eb2    | histocompatibility 2, class II antigen E beta2                                  | spleen - adult         | 5.0386  | 0.0002 |
| H2-Oa     | histocompatibility 2, O region alpha locus                                      | spleen - thymus        | 6.5328  | 0.0001 |
| Hamp      | hepcidin antimicrobial peptide                                                  | liver                  | 2.9829  | 0.0265 |
| Htra4     | HtrA serine peptidase 4                                                         | adrenal - lung         | 3.4506  | 0.0123 |
| Hvcn1     | hydrogen voltage-gated channel 1                                                | spleen - mammary gland | 2.6758  | 0.0247 |
| Il10ra    | interleukin 10 receptor, alpha                                                  | thymus - spleen        | 2.8126  | 0.0416 |
| Il12a     | interleukin 12a                                                                 | spleen - lung          | 2.8994  | 0.0332 |
| Il22      | interleukin 22                                                                  | cerebellum - intestine | 13.1907 | 0.0410 |
| Iqgap3    | IQ motif containing GTPase activating protein 3                                 | limb - CNS             | 2.8562  | 0.0115 |
| Ith2      | inter-alpha trypsin inhibitor, heavy chain 2                                    | liver                  | 4.9636  | 0.0123 |
| Kif11     | kinesin family member 11                                                        | CNS - liver            | 3.0915  | 0.0042 |
| Kif24     | kinesin family member 24                                                        | testis - CNS           | 4.3120  | 0.0292 |
| Krt25     | keratin 25                                                                      | cerebellum - placenta  | 8.1643  | 0.0335 |
| Lck       | lymphocyte protein tyrosine kinase                                              | thymus - spleen        | 2.8682  | 0.0005 |
| Lrrc23    | leucine rich repeat containing 23                                               | lung - testis          | 2.3185  | 0.0064 |
| Lyve1     | lymphatic vessel endothelial hyaluronan receptor 1                              | lung - liver           | 5.7736  | 0.0426 |
| Madcam1   | mucosal vascular addressin cell adhesion molecule 1                             | spleen - intestine     | 8.9650  | 0.0009 |
| Mif1      | myeloid leukemia factor 1                                                       | testis - heart         | 2.0992  | 0.0310 |
| Mns1      | meiosis-specific nuclear structural protein 1                                   | liver                  | 4.2458  | 0.0173 |
| Myk2      | myosin, light polypeptide kinase 2, skeletal muscle                             | mammary gland          | 7.1827  | 0.0279 |
| Myk3      | myosin, light polypeptide kinase 3, skeletal muscle                             | heart - liver          | 8.0759  | 0.0301 |
| Nprc      | natriuretic peptide type C                                                      | ovary - cerebellum     | 3.2419  | 0.0170 |
| Nsg2      | neuron specific gene family member 2                                            | CNS - brain            | 4.5395  | 0.0217 |
| Nyx       | nyctalopin                                                                      | ovary - testis         | 6.3240  | 0.0364 |
| Ooep      | oocyte expressed protein                                                        | bladder - ovary        | 3.1144  | 0.0019 |
| P2ry10    | purinergic receptor P2Y, G-protein coupled 10                                   | thymus - spleen        | 4.3968  | 0.0165 |
| Pdyn      | prodynorphin                                                                    | CNS - brain            | 7.0576  | 0.0229 |
| Pecam1    | platelet/endothelial cell adhesion molecule 1                                   | lung - fat pad         | 2.4883  | 0.0273 |
| Pglyrp2   | peptidoglycan recognition protein 2                                             | liver - thymus         | 2.5321  | 0.0021 |
| Plk3r6    | phosphoinositide-3-kinase regulatory subunit 5                                  | lung - mammary gland   | 5.8536  | 0.0386 |
| Pib1      | phospholipase B1                                                                | intestine - testis     | 2.1379  | 0.0002 |
| Prg2      | proteoglycan 2                                                                  | liver                  | 2.8337  | 0.0190 |
| Prg3      | proteoglycan 3                                                                  | liver                  | 3.9672  | 0.0250 |
| Prph      | peripherin                                                                      | CNS                    | 6.1944  | 0.0057 |
| Qrfpr     | pyroglutamylated RFamide peptide receptor                                       | brain                  | 5.5623  | 0.0089 |
| Rag1      | recombination activating gene 1                                                 | thymus - bone marrow   | 6.2759  | 0.0088 |
| Runx3     | runt related transcription factor 3                                             | spleen - thymus        | 2.9391  | 0.0034 |
| Ryr3      | ryanodine receptor 3                                                            | CNS - bladder          | 2.7214  | 0.0279 |
| S100a14   | S100 calcium binding protein A14                                                | bladder - colon        | 2.2439  | 0.0001 |
| Scube2    | signal peptide, CUB domain, EGF-like 2                                          | lung - bladder         | 6.4017  | 0.0001 |
| Serpina12 | serine (or cysteine) peptidase inhibitor, clade A                               | liver                  | 4.4931  | 0.0139 |
| Serpmb12  | serine (or cysteine) peptidase inhibitor, member b                              | lung - stomach         | 2.1352  | 0.0136 |
| Slc17a3   | solute carrier family 17 member 3                                               | kidney - liver         | 6.4444  | 0.0001 |
| Slc2a6    | solute carrier family 2 (facilitated glucose transporter), member 6             | cerebellum - spleen    | 6.6805  | 0.0054 |
| Slc7a15   | solute carrier family 7 (cationic amino acid transporter, y+ system), member 15 | intestine - duodenum   | 6.5729  | 0.0001 |
| Snce      | synuclein, gamma                                                                | fat pad                | 2.4389  | 0.0013 |
| Snx29     | sorting nexin 29                                                                | kidney - spleen        | 3.3393  | 0.0004 |
| Sostdc1   | sclerostin domain containing 1                                                  | kidney - limb          | 2.3161  | 0.0030 |
| Spag16    | sperm associated antigen 16                                                     | testis                 | 3.7948  | 0.0370 |
| Spic      | Spi-C transcription factor                                                      | liver - spleen         | 5.9688  | 0.0441 |
| Spon2     | spondin 2, extracellular matrix protein                                         | colon                  | 2.5576  | 0.0031 |
| Stmn2     | stathmin-like 2                                                                 | CNS - brain            | 2.5760  | 0.0014 |
| Strat6    | stimulated by retinoic acid gene 6                                              | ovary                  | 3.4318  | 0.0007 |
| Tbx21     | T-box 21                                                                        | spleen - brain         | 2.2845  | 0.0359 |
| Tcf7      | transcription factor 7, T cell specific                                         | thymus - spleen        | 3.5848  | 0.0001 |
| Tmem63c   | transmembrane protein 63c                                                       | cerebellum - testis    | 5.4051  | 0.0450 |
| Trib3     | tribbles pseudokinase 3                                                         | duodenum - intestine   | 3.2222  | 0.0209 |
| Tspyl5    | testis-specific protein, Y-encoded-like 5                                       | brain - testis         | 2.4381  | 0.0244 |
| Twist1    | twist basic helix-loop-helix transcription factor 1                             | limb, CNS              | 5.8015  | 0.0482 |
| Ubash3a   | ubiquitin associated and SH3 domain containing, A                               | thymus - liver         | 8.4886  | 0.0259 |
| Ubd       | ubiquitin D                                                                     | thymus - intestine     | 2.7031  | 0.0001 |
| Upk1a     | uropod protein 1A                                                               | bladder - ovary        | 10.9666 | 0.0104 |
| Upk3b     | uropod protein 1B                                                               | bladder - lung         | 2.4128  | 0.0452 |
